# Supplementary material for: Cross-stress gene expression atlas of Marchantia polymorpha reveals the hierarchy and regulatory principles of abiotic stress responses
Source: PubMed Central journal article supplement (PMC9946954; doi:10.1038/s41467-023-36517-w), 2023-02-22
Supplement: 41467_2023_36517_MOESM3_ESM.pdf [file 41467_2023_36517_MOESM3_ESM.pdf]

## Description of Additional Supplementary Files:

**Supplementary Data 1:** Summary of experiment labels to experiment conditions and mapping statistics from Kallisto.

**Supplementary Data 2:** TPM normalized gene expression matrix for Marchantia experiments

**Supplementary Data 3:** Raw gene expression matrix for Marchantia experiments

**Supplementary Data 4:** PCC values within Marchantia experiment replicates

**Supplementary Data 5:** Summary of DESeq2 output of Marchantia stress experiments

**Supplementary Data 6:** List of genes that are identified to be differentially expressed in both controls with corresponding MapMan bins and annotation. 'UP' and 'DOWN' in L2FC\_D2 and L2FC\_H2 columns indicate significant up and downregulation when compared against control D2 and H2 respectively. Controls D2 and H2 refer to Controls from batches L and F in supp. data 1 respectively.

**Supplementary Data 7:** List of Marchantia transcription factors, their robust response in specific stresses and functional studies found during a literature search.

**Supplementary Data 8:** Evidence of function in Arabidopsis orthologs of Marchantia transcription factors based on literature and gene expression changes.

**Supplementary Data 9:** Incidents of evidence in Arabidopsis (yellow) for each group of robustly responding Marchantia transcription factor (green)

**Supplementary Data 10:** Cold-Nitrogen deficiency specific genes as obtained from [conekt.plant.tools](http://conekt.plant.tools)
